# Supplementary material for: Metformin reduces airway glucose permeability and hyperglycaemia-induced Staphylococcus aureus load independently of effects on blood glucose
Source: HighWire-hosted journal article supplement (doi:10.1136/thoraxjnl-2012-203178), 2013-05-24

**Supplement Figure 1: Development of a *S. aureus* lung infection model in mouse.** C57BL/6 mice were inoculated with  $1 \times 10^7$  CFU of *S. aureus* strain 8325-4 (▪) in 100 $\mu$ l or an equivalent dose of bacteria that had been heat killed (HK 8325-4, ▽), or 100 $\mu$ l of bacterial broth intranasally. Weight loss (A), bacterial CFU detected in BAL (B), number of cells (C) and number of neutrophils (D) recovered in the BAL on day-1 and day-2 post-infection. Individual mice are shown as data points, the horizontal bars represent mean  $\pm$  SEM of  $n=10$  (A) and  $n=5$  (B-D). \*  $p < 0.05$ , \*\*  $p < 0.01$ , \*\*\*\*  $p < 0.0001$ .

Supplemental Figure 1

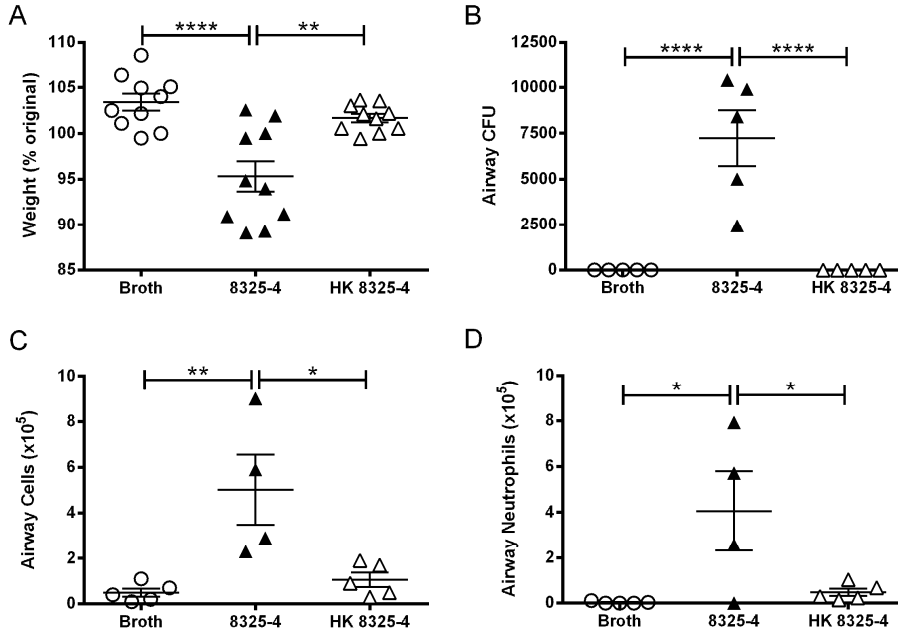

Supplement: thoraxjnl-2012-203178supp_figure.pdf [file thoraxjnl-2012-203178supp_figure.pdf]
